# Supplementary material for: Transcriptomic and Metabolomic Analyses Provide Insights into the Pathogenic Mechanism of the Rice False Smut Pathogen Ustilaginoidea virens
Source: MDPI journal article supplement (doi:10.3390/ijms241310805), 2023-06-28
Supplement: s1 [file s1]

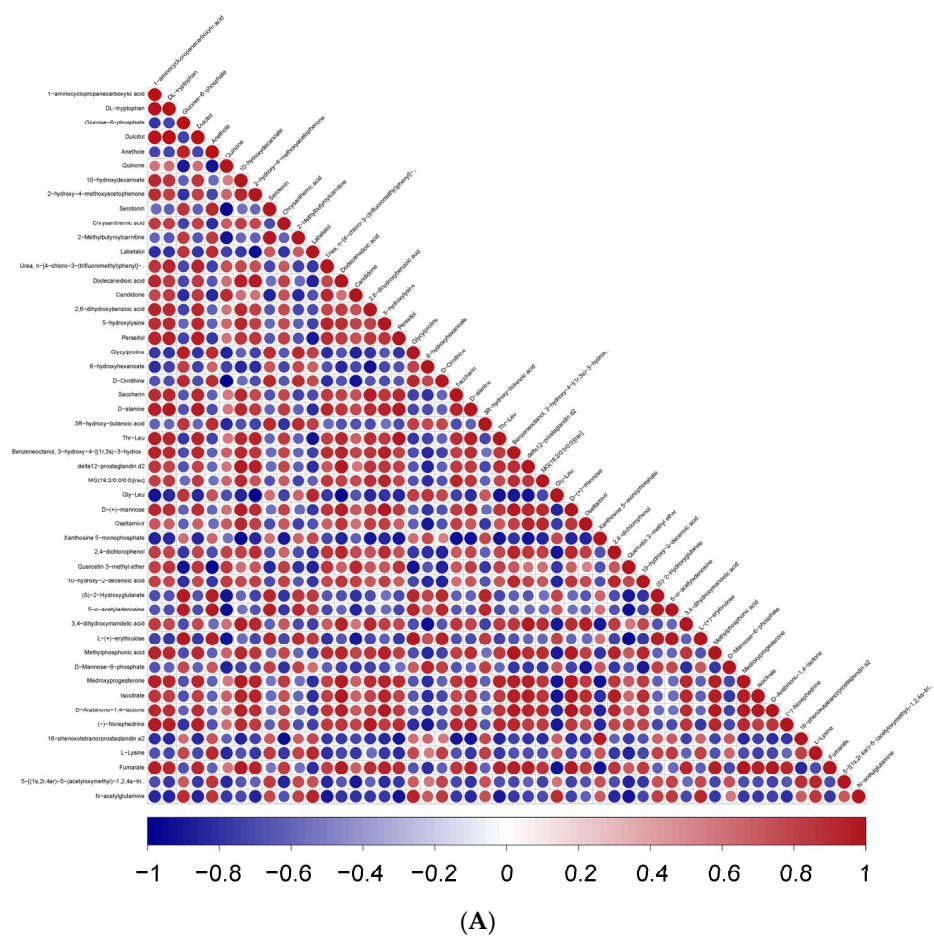

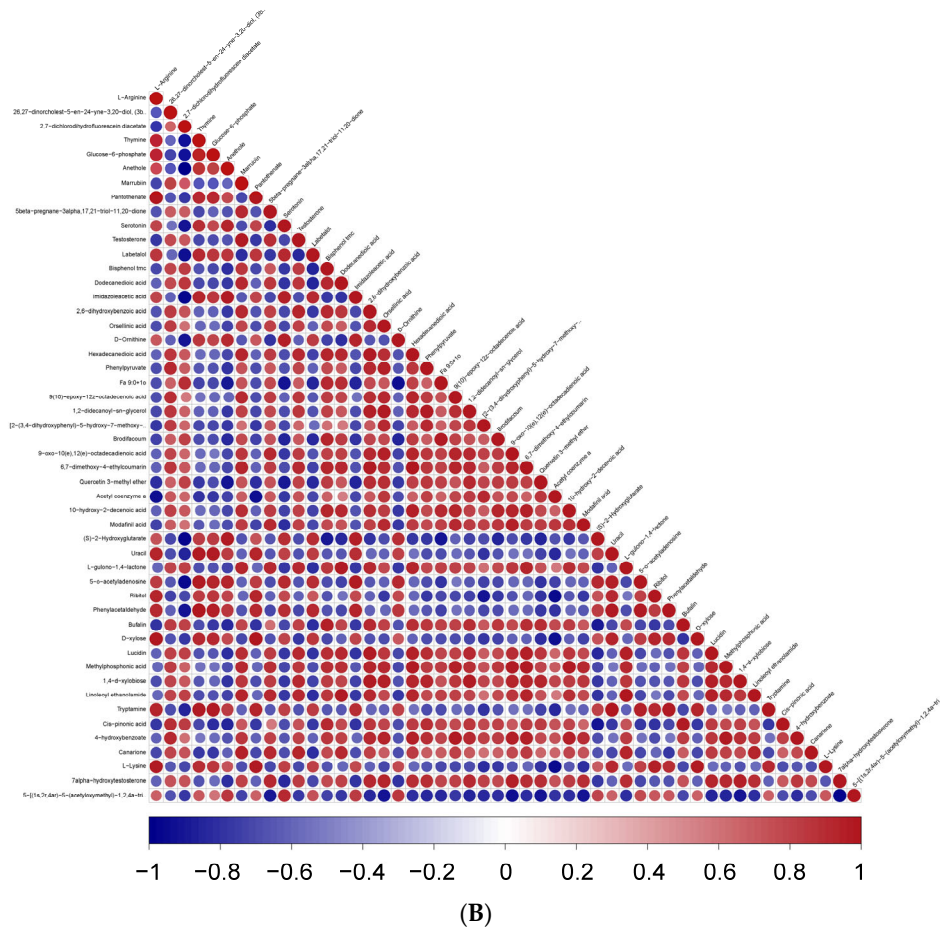

**Figure S1.** Correlation chart of the top 50 different metabolites. **A.** S1 vs. S0. **B.** W1 vs. W0. Note: The red shape indicates a positive correlation and the blue shape indicates a negative correlation.

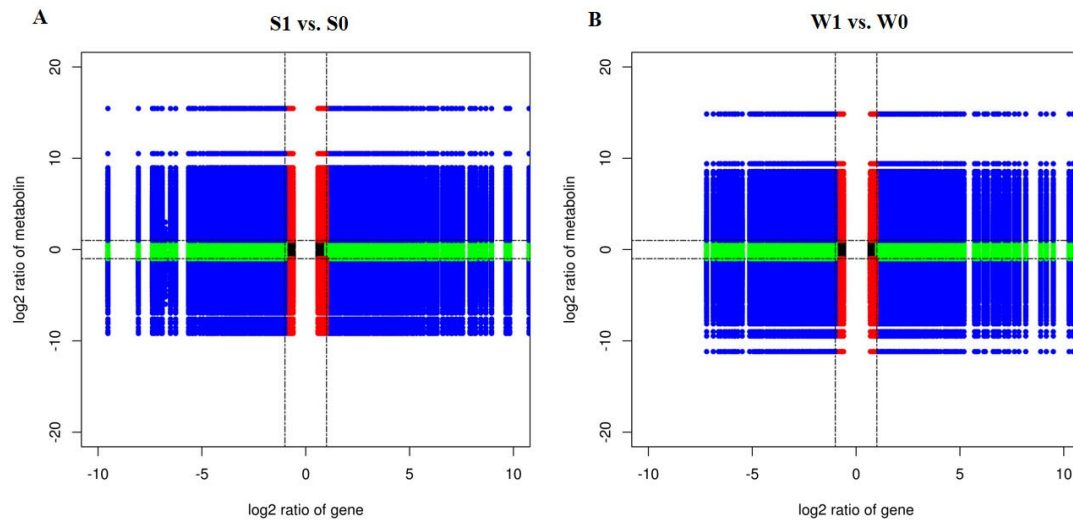

**Figure S2.** Nine-quadrant diagram of gene and metabolite correlation analysis. **A.** S1 vs. S0. **B.** W1 vs. W0. Note: In quadrant five, the gene and metabolite were not differentially expressed; in quadrants three and seven, the differential expression pattern of genes and metabolites was consistent; in quadrants one and nine, the differentially expressed patterns of genes and metabolites were opposite.

S1 vs. S0

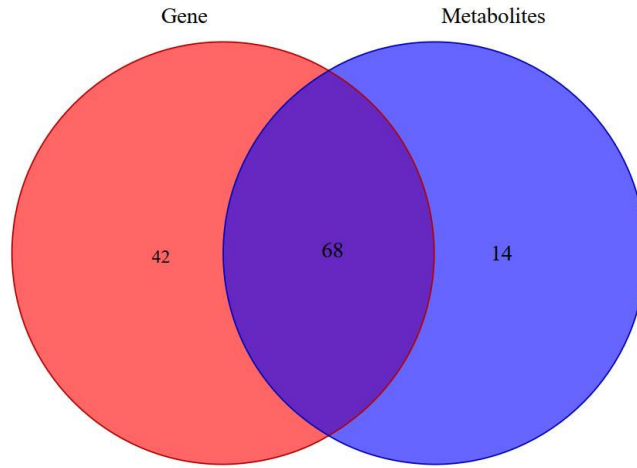

(A)

W1 vs. W0

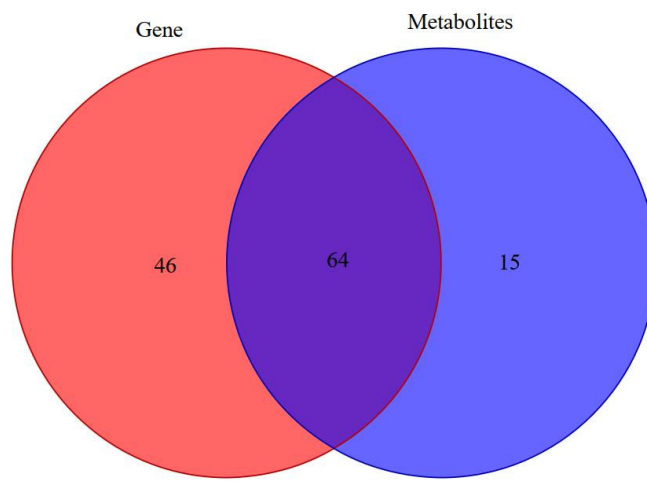

(B)

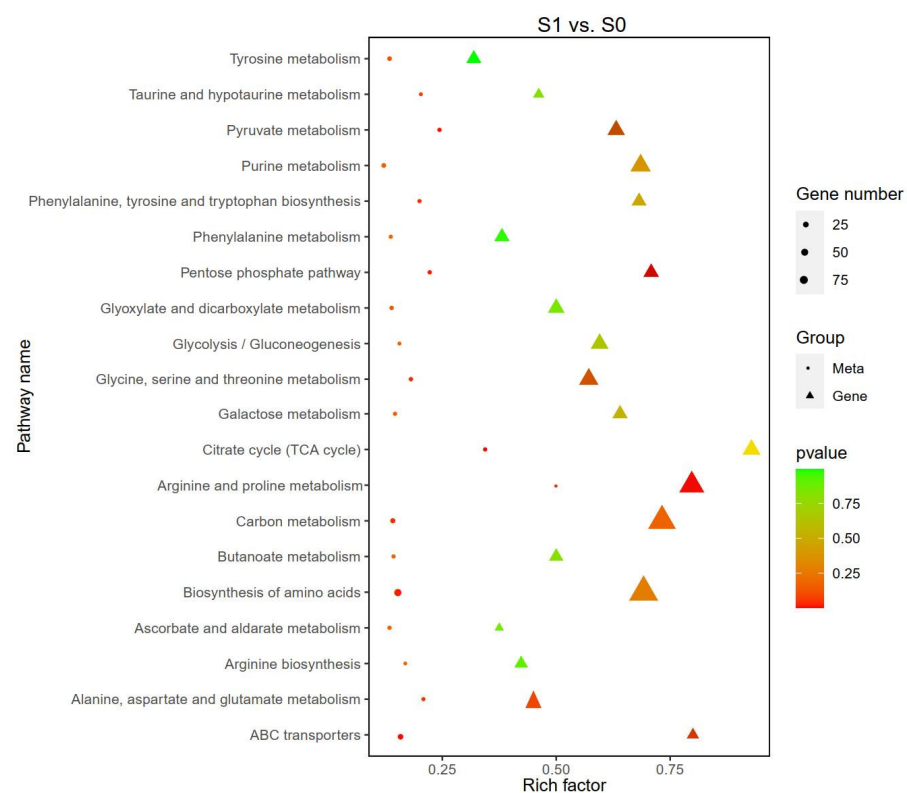

(C)

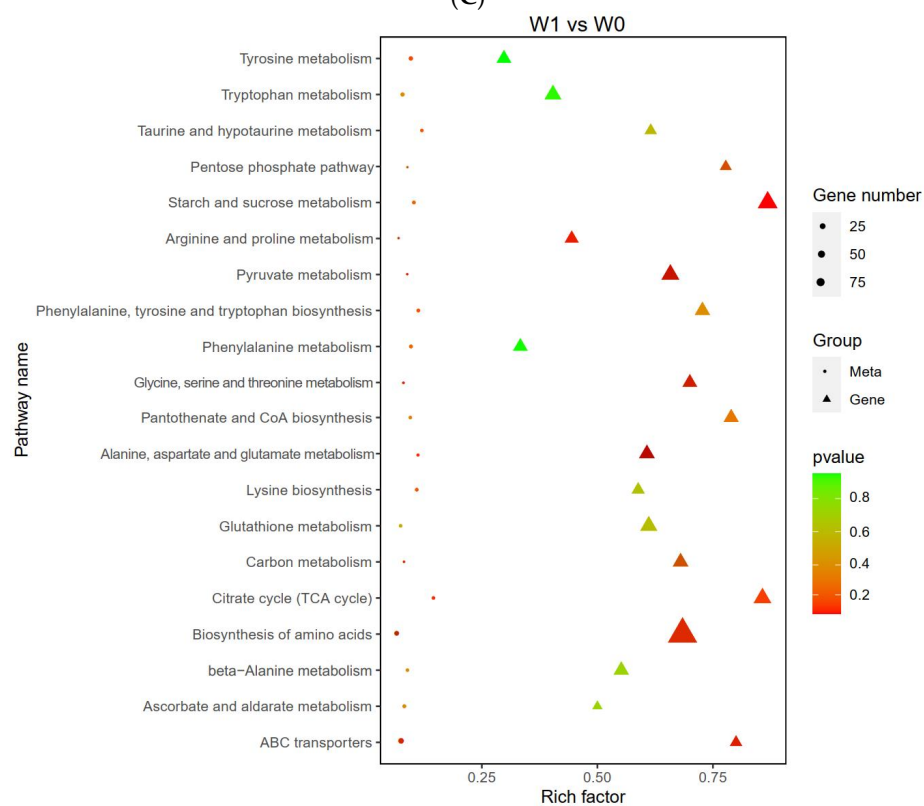

(D)

**Figure S3.** KEGG enrichment analysis of differentially expressed genes and differentially accumulated metabolites. **A-B.** Venn diagram of KEGG enrichment analysis in S1 vs. S0 and W1 vs. W0. **C-D.** Bubble diagram of KEGG enrichment analysis in S1 vs. S0 and W1 vs. W0.
